# Supplementary material
Source: ML conference proceedings conference paper supplement (https://openaccess.thecvf.com/content/WACV2023/html/Cho_Robust_and_Efficient_WACV_2023_paper.html)
Supplement: Supplementary file 1 [file Cho_Robust_and_Efficient_WACV_2023_supplemental.zip]

# Robust and Efficient Alignment of Calcium Imaging Data through Simultaneous Low Rank and Sparse Decomposition - Supplementary materials

Junmo Cho<sup>1,\*</sup>, Seungjae Han<sup>1,\*</sup>, Eun-Seo Cho<sup>1</sup>, Kijung Shin<sup>1,2</sup>, Young-Gyu Yoon<sup>1,3</sup>

<sup>1</sup>School of Electrical Engineering, KAIST

<sup>2</sup>Kim Jaechul Graduate School of AI, KAIST

<sup>3</sup>KAIST Institute for Health Science and Technology  
Daejeon, Republic of Korea

{junmokane, jay0118, eunseo.cho, kijungs, ygmoon}@kaist.ac.kr

## 1. Supplementary Notes

### 1.1. Larval zebrafish brain dataset description

Confocal microscopy images of larval zebrafish brains were acquired using a point-scanning confocal microscopy system (C2 Plus, Nikon) equipped with a 16x 0.8NA water dipping objective lens. We acquired 2-D video of neural activity at specific depths and 3-D video of neural activity by concatenating 2-D videos at different depths. For 2-D video, we obtained images with a size of  $512(x) \times 512(y)$ , and 60 frames in time. For 3-D video, we obtained volume images with a size of  $256(x) \times 512(y) \times 48(z)$ , and 60 frames in time.

For zebrafish experiments, larval zebrafish expressing pan-neuronal GCaMP7a with a casper background were imaged at 4 days post-fertilization (dpf). The fish were paralyzed by immersing in 0.25mg/ml of pancuronium bromide (Sigma-Aldrich) solution for 2 minutes and then embedded in agar with 2.0% low melting point agarose (TopVision) in Petri dishes. After the solidification of the agarose gel, the dishes were filled with standard fish water.

### 1.2. REALS algorithm

---

#### Algorithm 1 REALS

---

**Input:**  $Y \in \mathbb{R}^{m \times n}$

**Parameter:**  $W \in \mathbb{R}^{m \times r}$ ,

initialize  $\tau^\theta$  as  $\tau^I$  ( $I$ : identity).

$\eta_W, \eta_\theta$ : learning rate for  $W, \theta$  respectively.

$c$ : clamping constant.

**Output:**  $\tau^\theta(Y), L, S \in \mathbb{R}^{m \times n}$

```
1: while not done do
2:   for  $i = 1$  to  $r$  do
3:      $L_i = \sum_j < W_j, \tau_i^\theta(Y_i) > W_j$ 
4:      $S_i = \tau_i^\theta(Y_i) - L_i$ 
5:   end for
6:   Update  $W \leftarrow W - \eta_W \frac{\partial \|S\|_1}{\partial W}$ 
7:   Update  $\theta \leftarrow \theta - \eta_\theta \frac{\partial \|S\|_1}{\partial \theta}$ 
8:    $\theta \leftarrow \text{clamp}(\theta, I - c, I + c)$ 
9: end while
10: return  $\tau(Y), L, S$ 
```

---

---

\*Equal contribution

## 2. Supplementary Movies

- **Movie S1** Examples of aligned images and the corresponding *MSE*. Images of larval zebrafish brain were synthetically perturbed then aligned. *MSE*; 1st column: 0.000015, 0.00025, 0.0004 (from left), 2nd column: 0.001, 0.003, 0.006 (from left)
- **Movie S2** Alignment of images with additional image corruption using REALS. Images of larval zebrafish brain were synthetically corrupted, perturbed then aligned. 1st column: input images, 2nd column, aligned images, 3rd column: recovered low rank component, 4th column: sparse component. (a) With Poisson noise (brightness level of 100). (b) With Gaussian noise ( $\sigma = 0.01$ ). (c) With reduced scale of low rank component ( $\alpha = 0.4$ ).
- **Movie S3** Alignment of images with additional deformation using deformable REALS and Voxelmorph. 1st column: Input images, REALS, Voxelmorph (from left), 2nd column: input images, REALS, Voxelmorph (from left).
- **Movie S4** Alignment of a mouse brain image dataset that suffers from large motion. (a) Input images. (b) Aligned images.
- **Movie S5** Alignment of 3-D images using REALS. Three-dimensional images of a larval zebrafish brain were synthetically perturbed then aligned. Top left, lateral projection. Top right, axial projection. Bottom, rostral-caudal projection. (a) Input images. (b) Aligned images. (c) Recovered low rank component. (d) Sparse component. Scale bar, 100  $\mu\text{m}$ .
- **Movie S6** Alignment of larval zebrafish brain images with drift. (a-c) Low rank and sparse decomposition using REALS, but without updating transformation parameters. (a) Input images. (b) Low rank component of **a**. (c) Sparse component of **a**. (d-f) Low rank and sparse decomposition using REALS. (d) Aligned images of **a**. (e) Low rank component of **d**. (f) Sparse component of **d**. Scale bar, 30  $\mu\text{m}$ .

### 3. Supplementary Figures

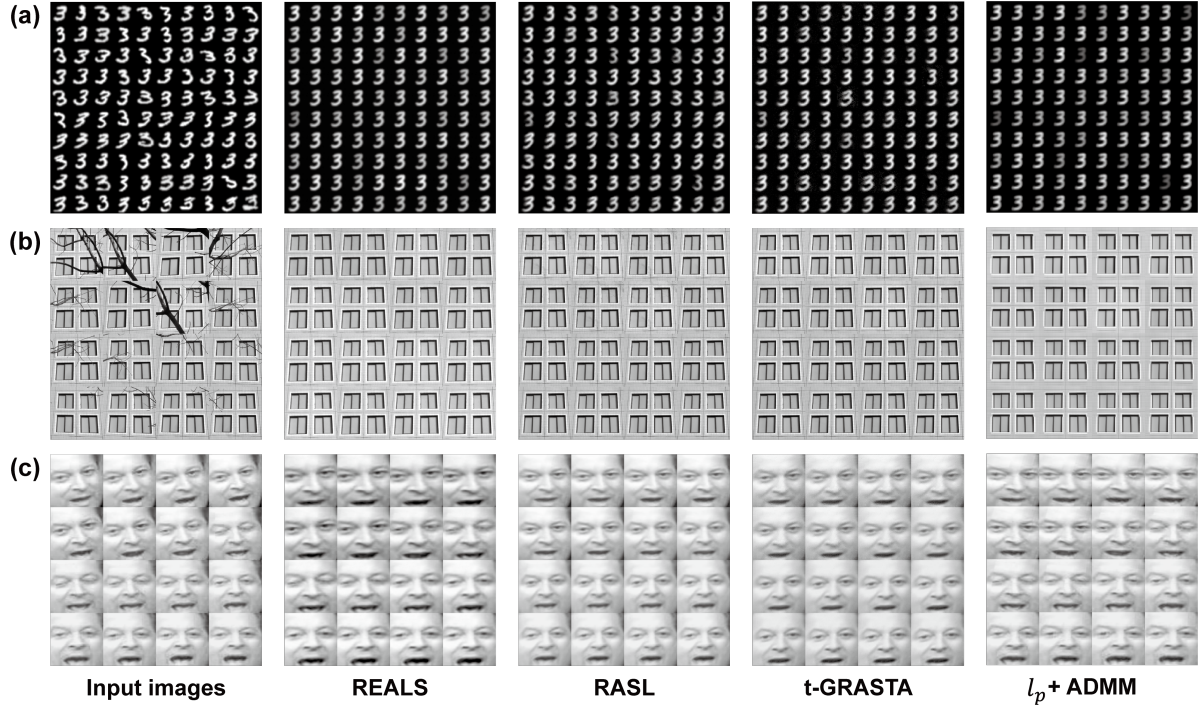

Figure 1: Input images and the recovered low rank images using REALS, RASL, t-GRASTA and  $l_p + \text{ADMM}$ . (a) 'Digit 3' dataset. (b) 'Window' dataset. (c) 'AI Gore' dataset.

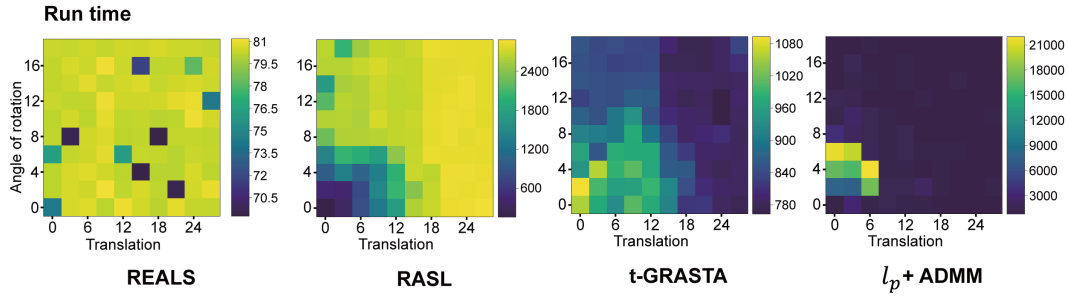

Figure 2: Heatmaps showing the run time of REALS, RASL, t-GRASTA, and  $l_p + \text{ADMM}$ . The algorithms were tested for the datasets with various levels of geometric perturbations (translation and rotation).

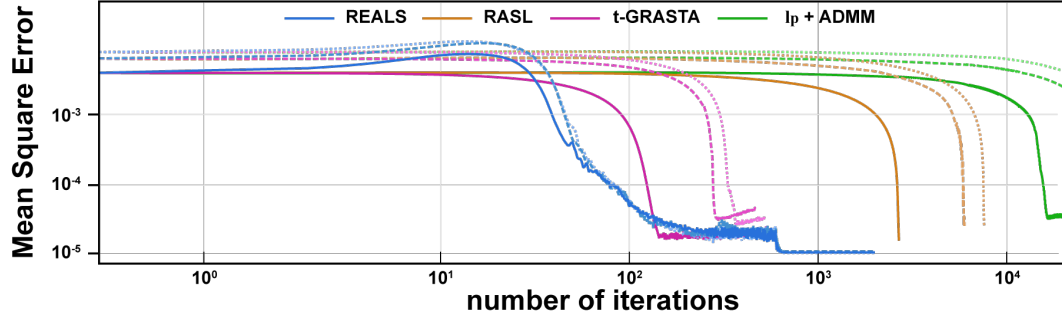

Figure 3: Mean square error of REALS, RASL, t-GRASTA,  $l_p$ +ADMM versus number of iterations. Solid:  $(t_0, \theta_0) = (12, 8)$ , Dashed:  $(t_0, \theta_0) = (18, 12)$ , Dotted:  $(t_0, \theta_0) = (24, 16)$ .

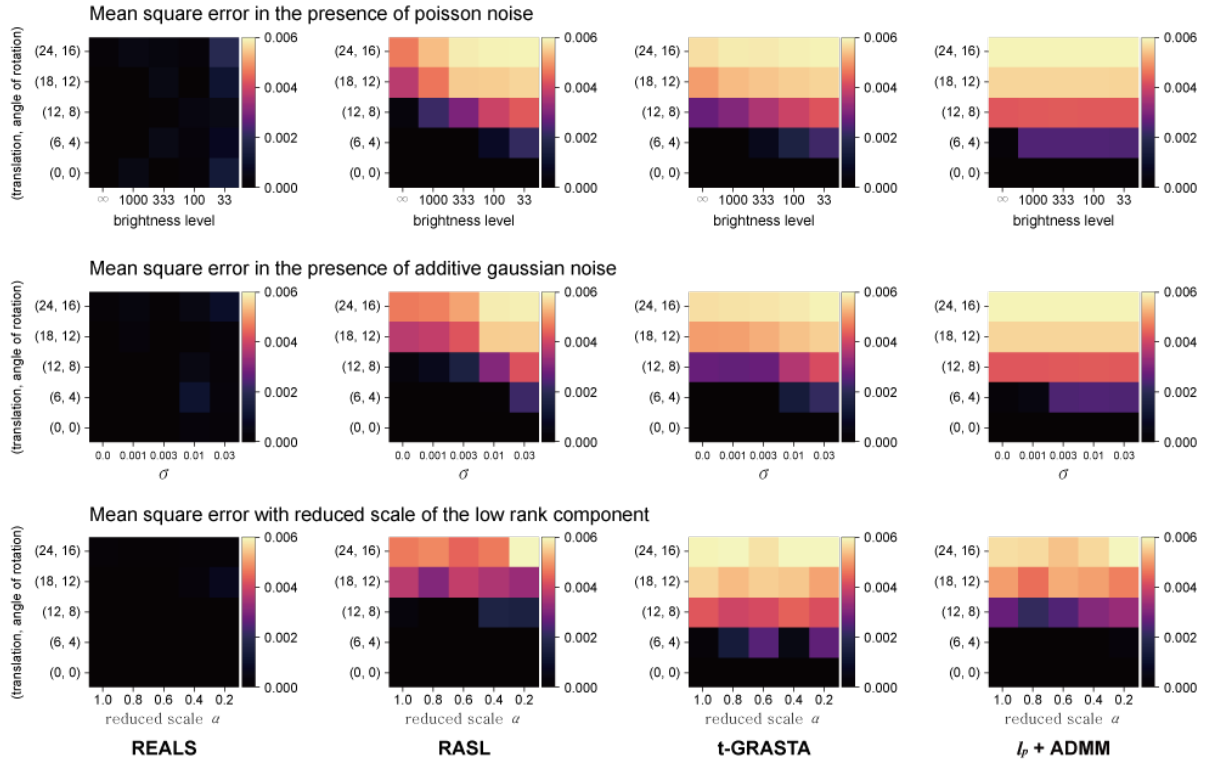

Figure 4: Heatmaps showing the mean squared error of REALS, RASL, t-GRASTA and  $l_p$ +ADMM. The algorithms were tested for the datasets with various levels of geometric perturbations (translation and rotation) and image corruptions.

## 4. Supplementary Tables

Table 1: Hyperparameters used for the experiments in section **Translation and Rotation**, and section **Additional image corruption**

| hyper-parameter         | setting                                                                                                  |
|-------------------------|----------------------------------------------------------------------------------------------------------|
| rank                    | 1                                                                                                        |
| learning rate of $W$    | $1 \times 10^{-4}$                                                                                       |
| learning rate of $\tau$ | $1 \times 10^{-2}$                                                                                       |
| epoch                   | 2000                                                                                                     |
| clamp                   | $-0.6 \leq \cos(\theta_{11}), \sin(\theta_{12}) \leq 0.6, -0.25 \leq \theta_{13}, \theta_{23} \leq 0.25$ |
| transformation          | Euclidean                                                                                                |
| batch size              | 60                                                                                                       |
| scheduler               | StepLR with step size 600, $\gamma = 0.1$                                                                |

Table 2: Hyperparameters used for the experiments in section **Multi-resolution REALS**. Same parameters were used for REALS and multi-resolution REALS .

| hyper-parameter         | setting                                                                                                  |
|-------------------------|----------------------------------------------------------------------------------------------------------|
| rank                    | 1                                                                                                        |
| learning rate of $W$    | $1 \times 10^{-4}$                                                                                       |
| learning rate of $\tau$ | $1 \times 10^{-2}$                                                                                       |
| epoch                   | 10000                                                                                                    |
| clamp                   | $-0.6 \leq \cos(\theta_{11}), \sin(\theta_{12}) \leq 0.6, -0.25 \leq \theta_{13}, \theta_{23} \leq 0.25$ |
| transformation          | Euclidean                                                                                                |
| batch size              | 60                                                                                                       |
| $K$                     | 3 (for multi-resolution REALS only)                                                                      |
| $\beta_k$               | $4^k$ (for multi-resolution REALS only)                                                                  |

Table 3: Deformable REALS and Voxelmorph performance

| $(t_0, \theta_0)$ | $\sigma_1 = 0.2, \sigma_2 = 40$ |                       | $\sigma_1 = 1, \sigma_2 = 40$ |                       |
|-------------------|---------------------------------|-----------------------|-------------------------------|-----------------------|
|                   | Deformable REALS                | Voxelmorph            | Deformable REALS              | Voxelmorph            |
| $(0, 0^\circ)$    | $6.40 \times 10^{-5}$           | $1.33 \times 10^{-4}$ | $1.32 \times 10^{-4}$         | $2.48 \times 10^{-4}$ |
| $(3, 2^\circ)$    | $8.21 \times 10^{-5}$           | $2.98 \times 10^{-4}$ | $1.32 \times 10^{-4}$         | $3.94 \times 10^{-4}$ |
| $(6, 4^\circ)$    | $1.39 \times 10^{-4}$           | $7.18 \times 10^{-4}$ | $1.85 \times 10^{-4}$         | $8.68 \times 10^{-4}$ |
| $(9, 6^\circ)$    | $2.42 \times 10^{-4}$           | $8.93 \times 10^{-4}$ | $2.95 \times 10^{-4}$         | $9.45 \times 10^{-4}$ |
| $(12, 8^\circ)$   | $5.23 \times 10^{-4}$           | $1.44 \times 10^{-3}$ | $5.32 \times 10^{-4}$         | $1.53 \times 10^{-3}$ |

Table 4: Hyperparameters used for the experiments in section **Mouse brain dataset**.

| hyper-parameter         | setting                                                                                                  |
|-------------------------|----------------------------------------------------------------------------------------------------------|
| rank                    | 2                                                                                                        |
| learning rate of $W$    | $1 \times 10^{-4}$                                                                                       |
| learning rate of $\tau$ | $1 \times 10^{-4}$                                                                                       |
| epoch                   | 4000                                                                                                     |
| clamp                   | $-0.6 \leq \cos(\theta_{11}), \sin(\theta_{12}) \leq 0.6, -0.25 \leq \theta_{13}, \theta_{23} \leq 0.25$ |
| transformation          | Euclidean                                                                                                |
| batch size              | 1000                                                                                                     |
| scheduler               | not used                                                                                                 |

Table 5: Hyperparameters used for the experiments in section **REALS on 3-D data**.

| hyper-parameter         | setting                                           |
|-------------------------|---------------------------------------------------|
| rank                    | 1                                                 |
| learning rate of $W$    | $1 \times 10^{-4}$                                |
| learning rate of $\tau$ | $1 \times 10^{-3}$                                |
| epoch                   | 1000                                              |
| clamp                   | $\theta_{11}, \theta_{22}, \theta_{33} \leq 1.02$ |
| transformation          | affine                                            |
| batch size              | 30                                                |
| scheduler               | not used                                          |

Table 6: Training details for section **REALS with NMF**.

| hyper-parameter         | setting                                                                                                    |
|-------------------------|------------------------------------------------------------------------------------------------------------|
| rank                    | 1                                                                                                          |
| number of components    | 50                                                                                                         |
| learning rate of $W$    | $1 \times 10^{-4}$                                                                                         |
| learning rate of $\tau$ | $1 \times 10^{-3}$                                                                                         |
| epoch                   | 600                                                                                                        |
| clamp                   | $-0.05 \leq \cos(\theta_{11}), \sin(\theta_{12}) \leq 0.05, -0.05 \leq \theta_{13}, \theta_{23} \leq 0.05$ |
| transformation          | Euclidean                                                                                                  |
| batch size              | 128                                                                                                        |
| scheduler               | not used                                                                                                   |
