# Supplementary material
Source: ML conference proceedings conference paper supplement (https://openaccess.thecvf.com/content/WACV2023/html/Cho_Robust_and_Efficient_WACV_2023_paper.html)
Supplement: Supplementary file 2 [file Cho_Robust_and_Efficient_WACV_2023_supplemental.zip]

Archive with 27 entries (27 files):
- Codes/REALS-main/README.md
- Codes/REALS-main/reals/deformable_REALS.py
- Codes/REALS-main/reals/model.py
- Codes/REALS-main/reals/REALS.py
- Codes/REALS-main/reals/REALS_3d.py
- Codes/REALS-main/reals/REALS_minibatch.py
- Codes/REALS-main/reals/REALS_multi.py
- Codes/REALS-main/requirements.txt
- Codes/REALS-main/scripts/eval_barplot.py
- Codes/REALS-main/scripts/eval_heatmap.py
- Codes/REALS-main/scripts/eval_timeplot.py
- Codes/REALS-main/scripts/generate_gaussian_noise.py
- Codes/REALS-main/scripts/generate_oscillation.py
- Codes/REALS-main/scripts/generate_oscillation_deformable.py
- Codes/REALS-main/scripts/generate_poisson_noise.py
- Codes/REALS-main/scripts/run_deformable_reals.py
- Codes/REALS-main/scripts/run_reals.py
- Codes/REALS-main/scripts/run_reals_3d.py
- Codes/REALS-main/scripts/run_reals_minibatch.py
- Codes/REALS-main/scripts/run_reals_multi.py
- Movies/MovieS1_Assessment_of_MSE.mp4
- Movies/MovieS2_Alignment_with_additional_corruption.mp4
- Movies/MovieS3_Deformable_REALS_Voxelmorph.mp4
- Movies/MovieS4_Alignment_of_mouse_brain_image_dataset.mp4
- Movies/MovieS5_Alignment_of_3-D_images.mp4
- Movies/MovieS6_REALS_with_NMF.mp4
- WACV_2023_REALS_supp.pdf
