# Supplementary material
Source: ML conference proceedings conference paper supplement (https://openaccess.thecvf.com/content/WACV2023/html/Cho_Robust_and_Efficient_WACV_2023_paper.html)
Supplement: Supplementary file 2 [file Cho_Robust_and_Efficient_WACV_2023_supplemental.zip › Codes/REALS-main/README.md]

# Robust and Efficient Image Alignment through Simultaneous Low Rank and Sparse Decomposition

This repository is the official implementation of [Robust and Efficient Image Alignment through Simultaneous Low Rank and Sparse Decomposition]().

## Requirements

To install requirements:

```setup
conda create -n reals python=3.8.10
conda activate reals
pip install -r requirements.txt
```

Data for REALS is required for execution of the code. 
- [2-D Zebrafish brain data](): Static data with size [512(x), 512(y), 60(z)]. Additional perturbations or noise can be applied.
- [3-D Zebrafish brain data](): Data with size [256(x), 512(y), 48(z), 60(t)]. Random translation and rotation are applied synthetically.
- [Mouse brain data](): Data with size [480(x), 752(y), 1000(t)]. `Y.tif` is the original video, and `Y_DoG.tif` is high pass filtered video.
- [2-D Zebrafish brain data with drift](): Data with size [256(x), 512(y), 600(t)]. Original video has small drift.

To run `run_reals.py`, you have to generate data with perturbation from static 2-D Zebrafish brain data. 
- `generate_oscillation.py` generates randomly perturbed data with corresponding transformation from static 2-D Zebrafish brain data.

If you want to add noise to above generated data,
- `generate_gaussian_noise.py` generates data with gaussian noise from perturbed data.
- `generate_poisson_noise.py` generates data with poisson noise from perturbed data.

## Training

`run_reals.py` can reproduce most of the results in the paper. Run following command:
```run_reals
python -m scripts.run_reals --type normal
```
To perform REALS on 3-D Zebrafish brain data, run following command: 
```run_reals_3d
python -m scripts.run_reals_3d
```
We also provide the mini-batch and multi-resolution version of REALS in `run_reals_minibatch.py`, `run_reals_multi.py` respectively.

After running REALS on one sample data, there will be composite transformation `tau`, original images `Y`, aligned images `L`,
low-rank component `L_stat`, and sparse component `S` in the resulting directory.

## Evaluation

We provide 3 sample codes for evaluation. However, the codes can perfectly reproduce the results in original paper only when
required results are fully available. So, it may require to modify some parts of the code to analyze the result with below codes.
- `eval_heatmap.py` shows the alignment inconsistency heatmap.  
- `eval_barplot.py` shows the alignment inconsistency bar plot of REALS. It is to check performance with different batch size.
- `eval_timeplot.py` shows the (time, alignment inconsistency) plot. You need to save time and transformation at each iteration to plot the result.

## Results
We will make it available after the review.

## Contributing
The base code is from [BEAR](https://github.com/NICALab/BEAR). We will make it available after the review.
