# Supplementary material
Source: ML conference proceedings conference paper supplement (https://openaccess.thecvf.com/content/WACV2023/html/Cho_Robust_and_Efficient_WACV_2023_paper.html)
Supplement: Supplementary file 2 [file Cho_Robust_and_Efficient_WACV_2023_supplemental.zip › Codes/REALS-main/requirements.txt]

matplotlib==3.4.2
numpy==1.20.2
pip==21.1.1
scikit-image==0.18.1
scipy==1.6.2
torch==1.8.1
wheel==0.36.2
